# Supplementary material for: Measuring factors affecting implementation of health innovations: a systematic review of structural, organizational, provider, patient, and innovation level measures
Source: Springer Nature journal article supplement (doi:10.1186/1748-5908-8-22), 2013-02-17

## Causal Factors

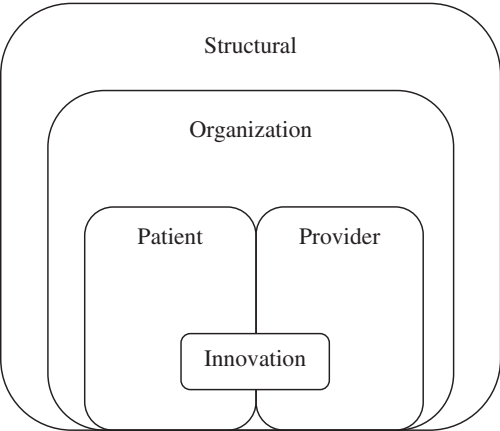

## Implementation Outcomes

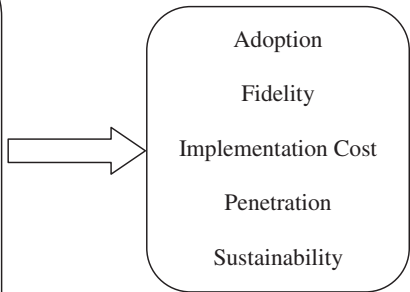

Supplement: 13012_2012_589_MOESM3_ESM.pdf [file 13012_2012_589_MOESM3_ESM.pdf]
